# Supplementary material
Source: publisher figshare collection journal article supplement (https://acs.figshare.com/ndownloader/files/4661569)

Cc1ccccc1Si(C)C  
 Proton

2.29200  
 2.29015  
 2.28815  
 2.28615  
 2.28420  
 2.28220  
 2.28020  
 2.27820  
 2.27620  
 2.27420  
 2.27220  
 2.27020  
 2.26820  
 2.26620  
 2.26420  
 2.26220  
 2.26020  
 2.25820  
 2.25620  
 2.25420  
 2.25220  
 2.25020  
 2.24820  
 2.24620  
 2.24420  
 2.24220  
 2.24020  
 2.23820  
 2.23620  
 2.23420  
 2.23220  
 2.23020  
 2.22820  
 2.22620  
 2.22420  
 2.22220  
 2.22020  
 2.21820  
 2.21620  
 2.21420  
 2.21220  
 2.21020  
 2.20820  
 2.20620  
 2.20420  
 2.20220  
 2.20020  
 2.19820  
 2.19620  
 2.19420  
 2.19220  
 2.19020  
 2.18820  
 2.18620  
 2.18420  
 2.18220  
 2.18020  
 2.17820  
 2.17620  
 2.17420  
 2.17220  
 2.17020  
 2.16820  
 2.16620  
 2.16420  
 2.16220  
 2.16020  
 2.15820  
 2.15620  
 2.15420  
 2.15220  
 2.15020  
 2.14820  
 2.14620  
 2.14420  
 2.14220  
 2.14020  
 2.13820  
 2.13620  
 2.13420  
 2.13220  
 2.13020  
 2.12820  
 2.12620  
 2.12420  
 2.12220  
 2.12020  
 2.11820  
 2.11620  
 2.11420  
 2.11220  
 2.11020  
 2.10820  
 2.10620  
 2.10420  
 2.10220  
 2.10020  
 2.09820  
 2.09620  
 2.09420  
 2.09220  
 2.09020  
 2.08820  
 2.08620  
 2.08420  
 2.08220  
 2.08020  
 2.07820  
 2.07620  
 2.07420  
 2.07220  
 2.07020  
 2.06820  
 2.06620  
 2.06420  
 2.06220  
 2.06020  
 2.05820  
 2.05620  
 2.05420  
 2.05220  
 2.05020  
 2.04820  
 2.04620  
 2.04420  
 2.04220  
 2.04020  
 2.03820  
 2.03620  
 2.03420  
 2.03220  
 2.03020  
 2.02820  
 2.02620  
 2.02420  
 2.02220  
 2.02020  
 2.01820  
 2.01620  
 2.01420  
 2.01220  
 2.01020  
 2.00820  
 2.00620  
 2.00420  
 2.00220  
 2.00020  
 1.99820  
 1.99620  
 1.99420  
 1.99220  
 1.99020  
 1.98820  
 1.98620  
 1.98420  
 1.98220  
 1.98020  
 1.97820  
 1.97620  
 1.97420  
 1.97220  
 1.97020  
 1.96820  
 1.96620  
 1.96420  
 1.96220  
 1.96020  
 1.95820  
 1.95620  
 1.95420  
 1.95220  
 1.95020  
 1.94820  
 1.94620  
 1.94420  
 1.94220  
 1.94020  
 1.93820  
 1.93620  
 1.93420  
 1.93220  
 1.93020  
 1.92820  
 1.92620  
 1.92420  
 1.92220  
 1.92020  
 1.91820  
 1.91620  
 1.91420  
 1.91220  
 1.91020  
 1.90820  
 1.90620  
 1.90420  
 1.90220  
 1.90020  
 1.89820  
 1.89620  
 1.89420  
 1.89220  
 1.89020  
 1.88820  
 1.88620  
 1.88420  
 1.88220  
 1.88020  
 1.87820  
 1.87620  
 1.87420  
 1.87220  
 1.87020  
 1.86820  
 1.86620  
 1.86420  
 1.86220  
 1.86020  
 1.85820  
 1.85620  
 1.85420  
 1.85220  
 1.85020  
 1.84820  
 1.84620  
 1.84420  
 1.84220  
 1.84020  
 1.83820  
 1.83620  
 1.83420  
 1.83220  
 1.83020  
 1.82820  
 1.82620  
 1.82420  
 1.82220  
 1.82020  
 1.81820  
 1.81620  
 1.81420  
 1.81220  
 1.81020  
 1.80820  
 1.80620  
 1.80420  
 1.80220  
 1.80020  
 1.79820  
 1.79620  
 1.79420  
 1.79220  
 1.79020  
 1.78820  
 1.78620  
 1.78420  
 1.78220  
 1.78020  
 1.77820  
 1.77620  
 1.77420  
 1.77220  
 1.77020  
 1.76820  
 1.76620  
 1.76420  
 1.76220  
 1.76020  
 1.75820  
 1.75620  
 1.75420  
 1.75220  
 1.75020  
 1.74820  
 1.74620  
 1.74420  
 1.74220  
 1.74020  
 1.73820  
 1.73620  
 1.73420  
 1.73220  
 1.73020  
 1.72820  
 1.72620  
 1.72420  
 1.72220  
 1.72020  
 1.71820  
 1.71620  
 1.71420  
 1.71220  
 1.71020  
 1.70820  
 1.70620  
 1.70420  
 1.70220  
 1.70020  
 1.69820  
 1.69620  
 1.69420  
 1.69220  
 1.69020  
 1.68820  
 1.68620  
 1.68420  
 1.68220  
 1.68020  
 1.67820  
 1.67620  
 1.67420  
 1.67220  
 1.67020  
 1.66820  
 1.66620  
 1.66420  
 1.66220  
 1.66020  
 1.65820  
 1.65620  
 1.65420  
 1.65220  
 1.65020  
 1.64820  
 1.64620  
 1.64420  
 1.64220  
 1.64020  
 1.63820  
 1.63620  
 1.63420  
 1.63220  
 1.63020  
 1.62820  
 1.62620  
 1.62420  
 1.62220  
 1.62020  
 1.61820  
 1.616

**Figure S2.** Carbon-13 NMR spectrum of Starting Material Phenyltrimethylsilane (1).

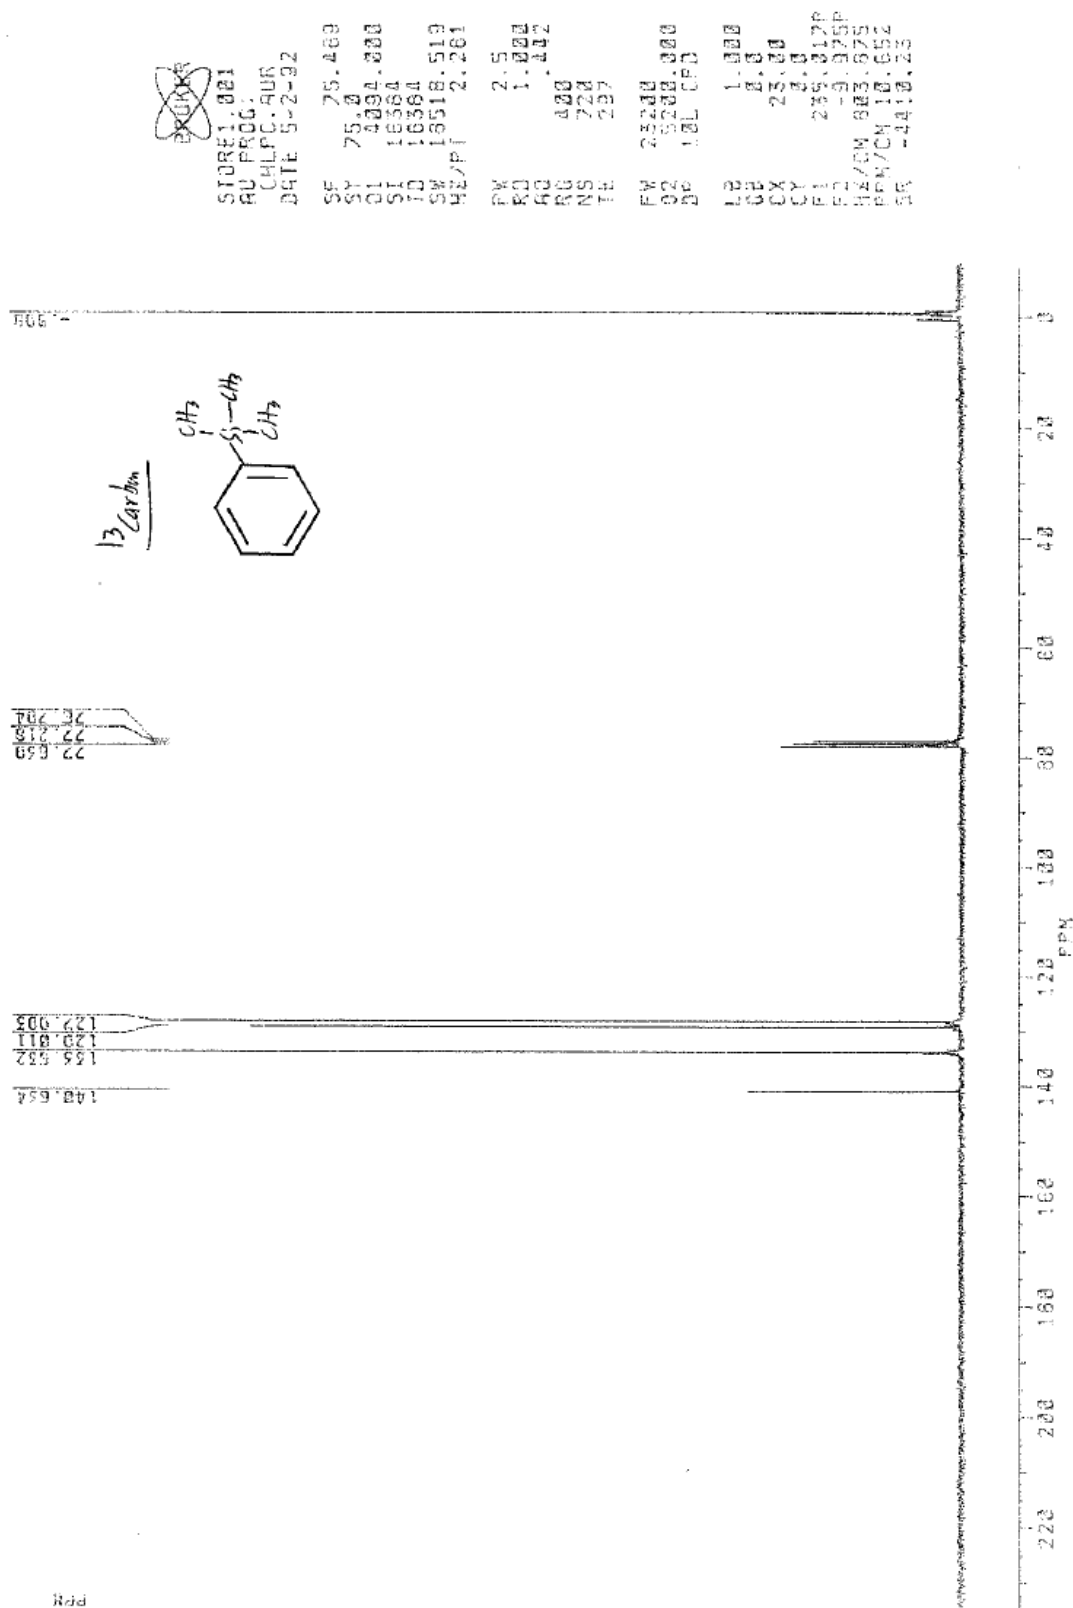

**Figure S3.** Proton NMR spectrum of Related Product Trifluoroacetophenone (5).

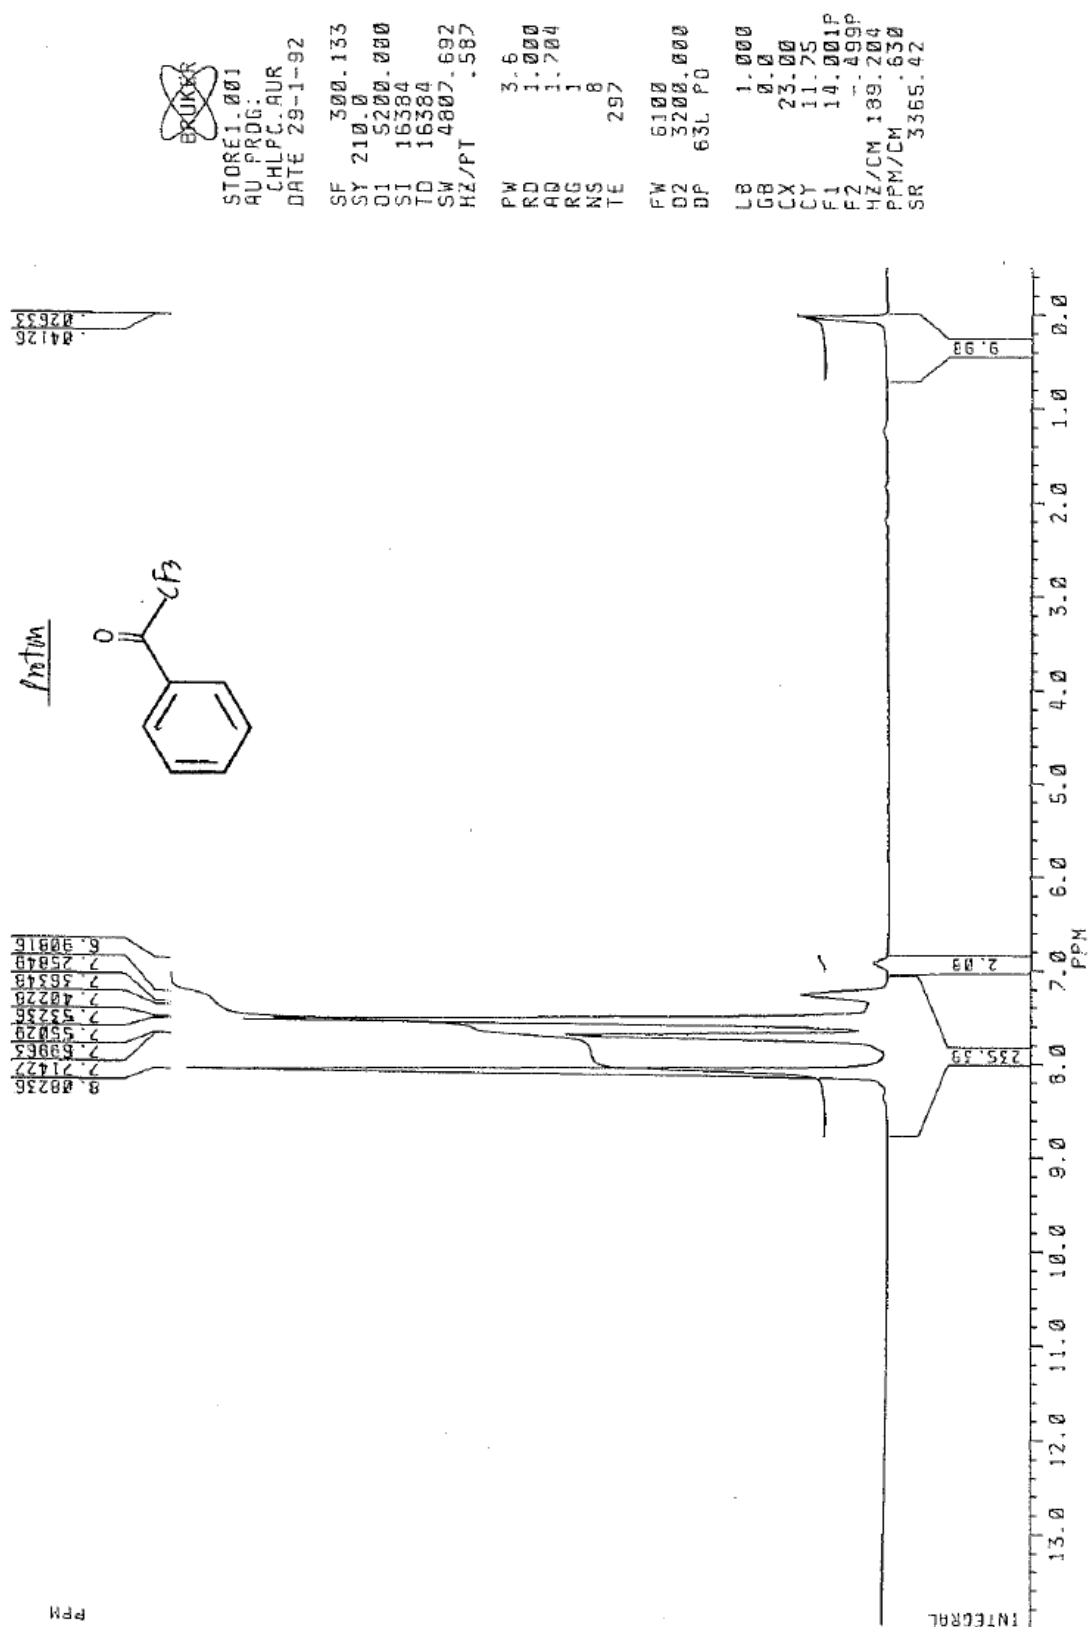

**Figure S4.** Carbon-13 NMR spectrum of Related Product Trifluoroacetophenone (5).

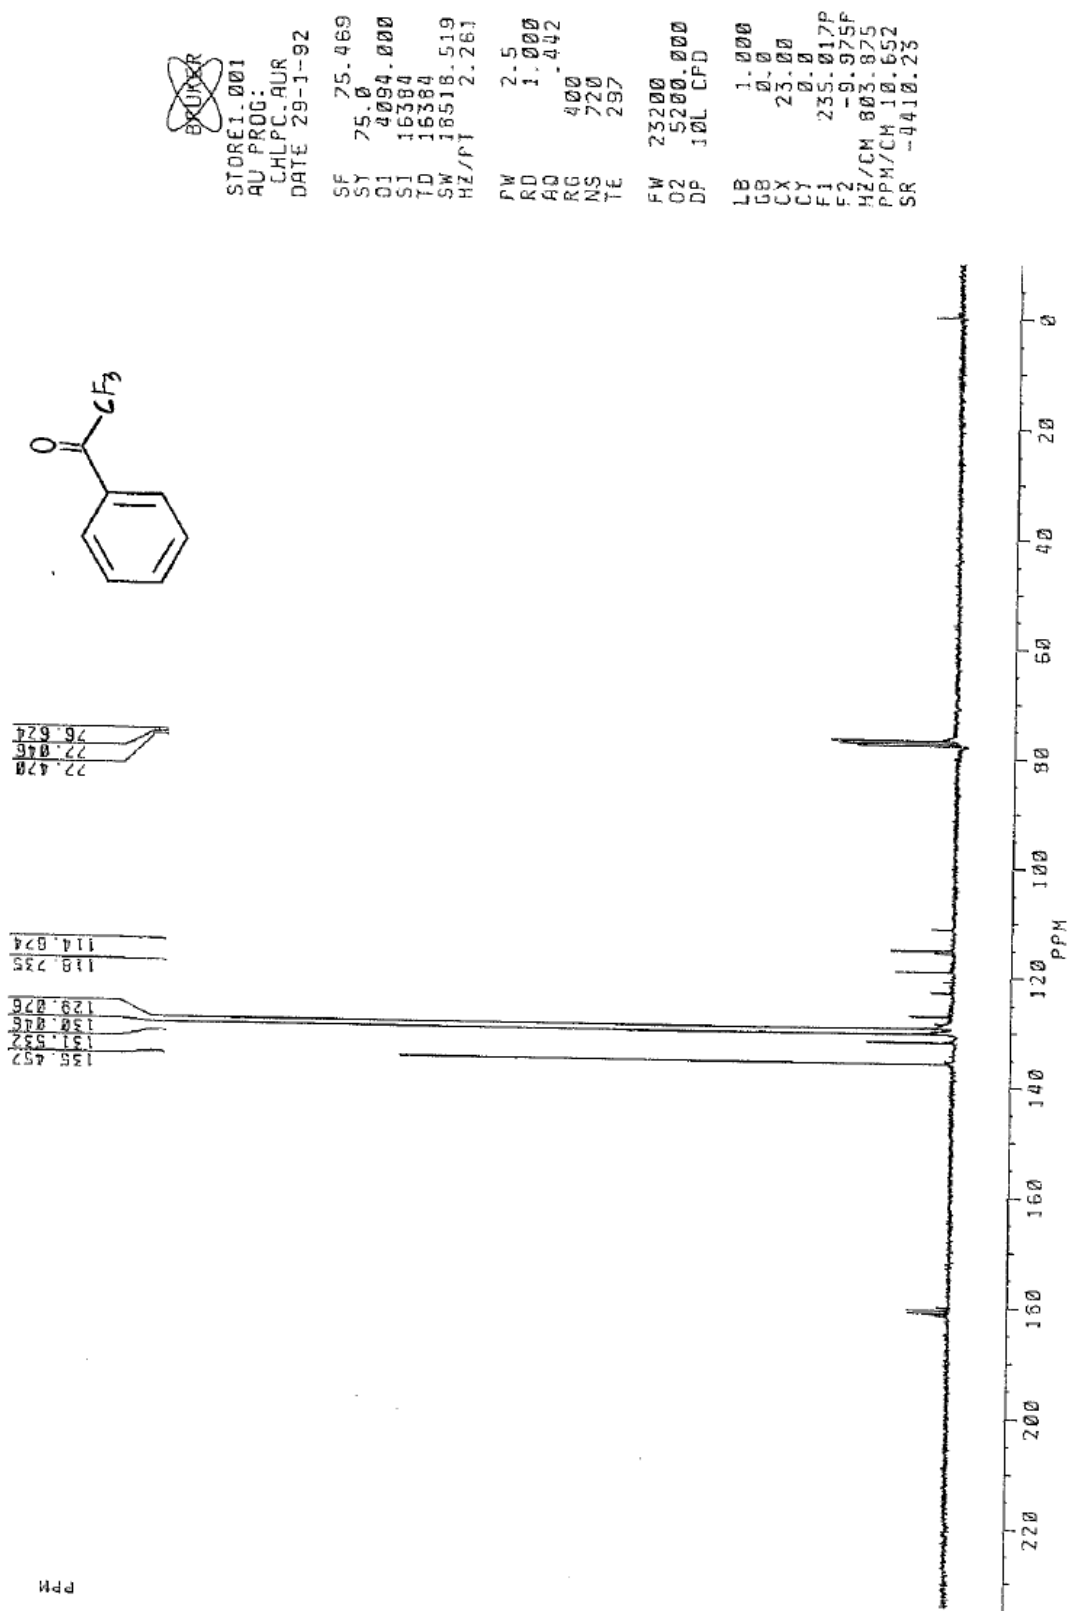

**Figure S5.** Proton NMR spectrum of Phenyltrimethylsilane Plus Trifluoroacetic Anhydride/Aluminum Chloride Crude Reaction Mixture.

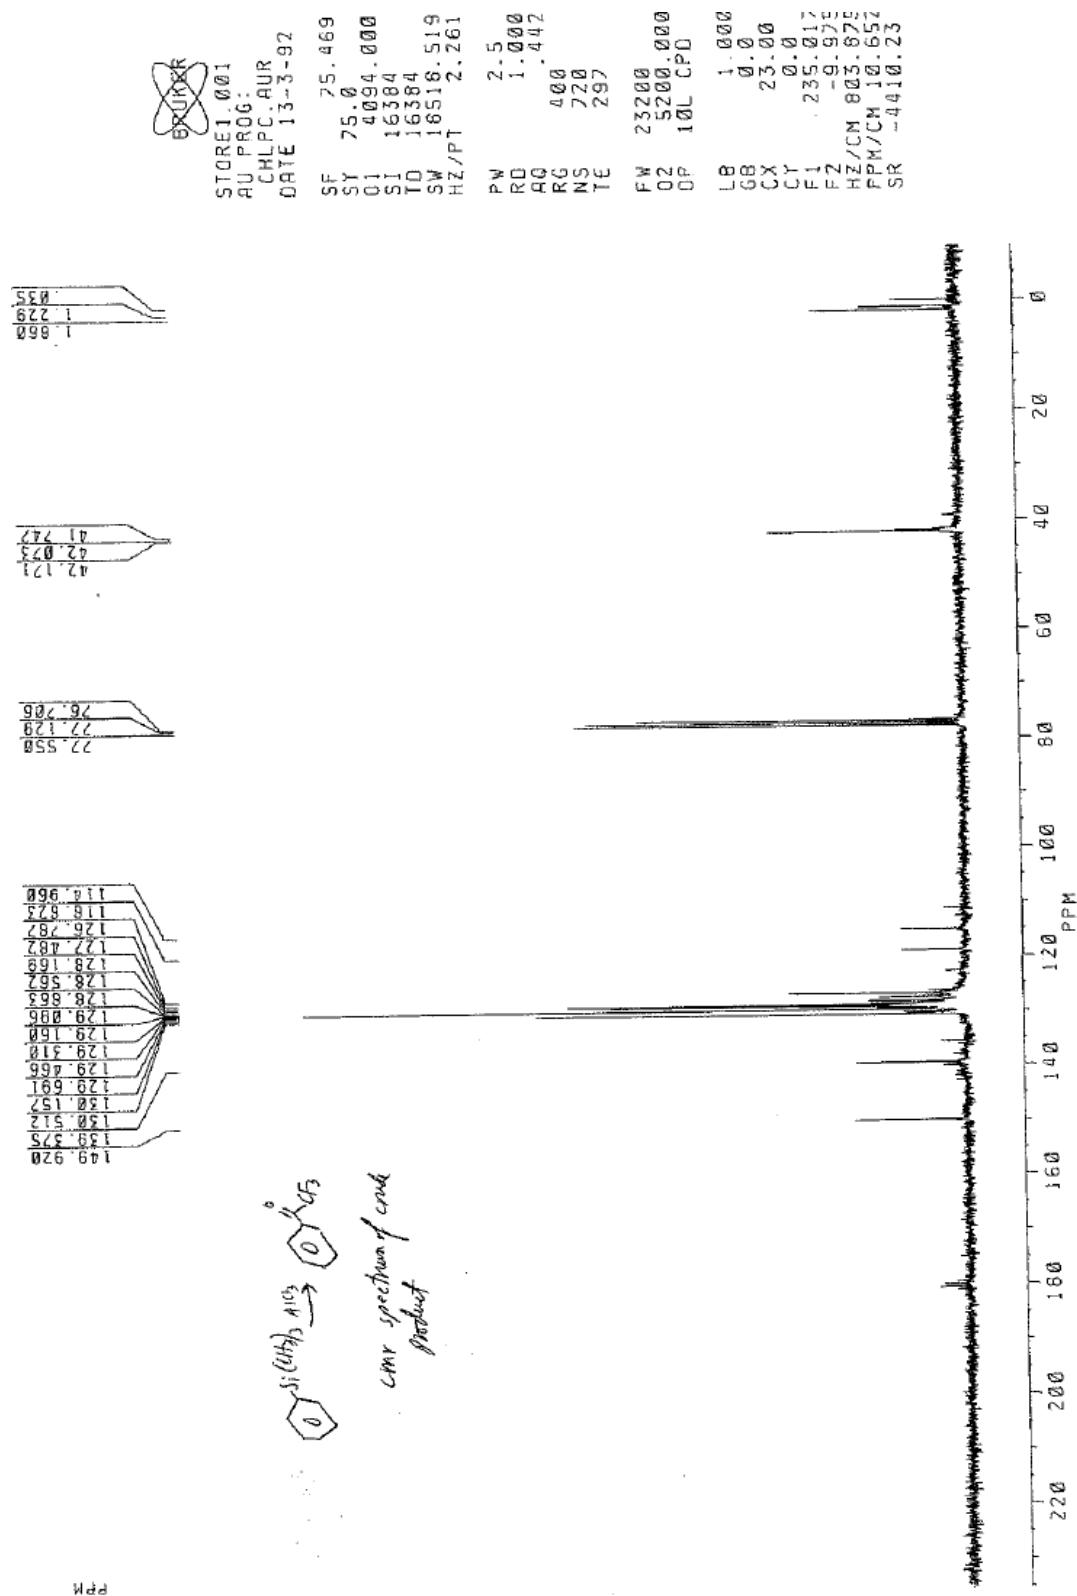

PPM

INTEGRAL

ppm spectrum of crude product

c1ccc(cc1)S(=O)(=O)c2ccccc2
 $\xrightarrow{AlCl_3}$ 
c1ccc(cc1)S(=O)(=O)c2ccccc2

1.2-1.6 ppm (multiplet, 1H)  
 2.4-2.6 ppm (multiplet, 2H)  
 4.0-4.2 ppm (multiplet, 2H)  
 7.0-7.8 ppm (multiplet, 10H)  
 7.9-8.0 ppm (multiplet, 1H)

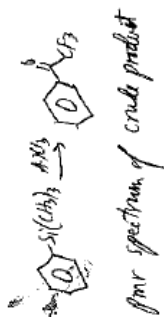

Supplement: Supplementary file 1 [file 4661569]
